# Supplementary material
Source: PubMed Central journal article supplement (PMC4955049)

Fig.S1

A

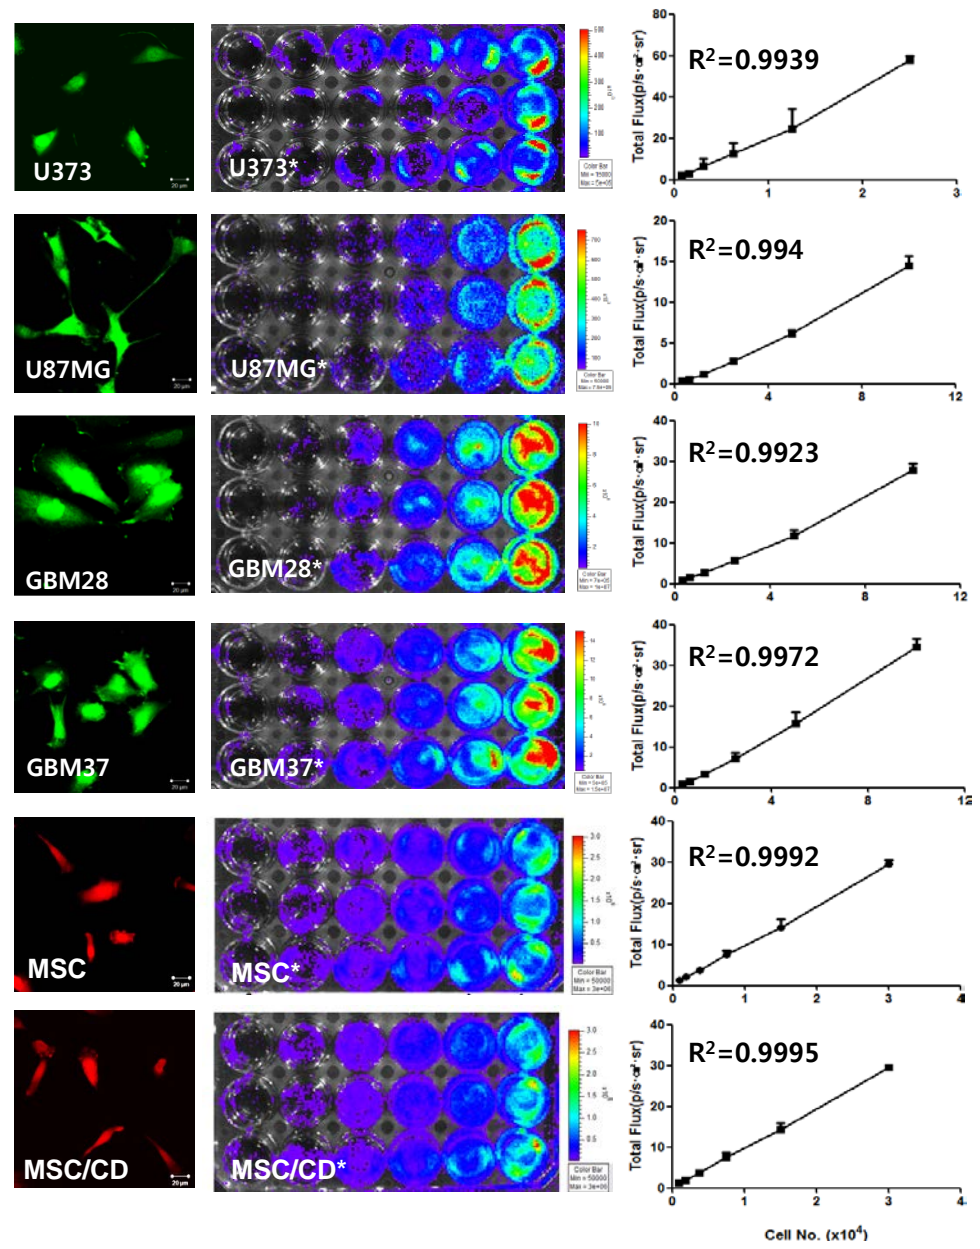

B

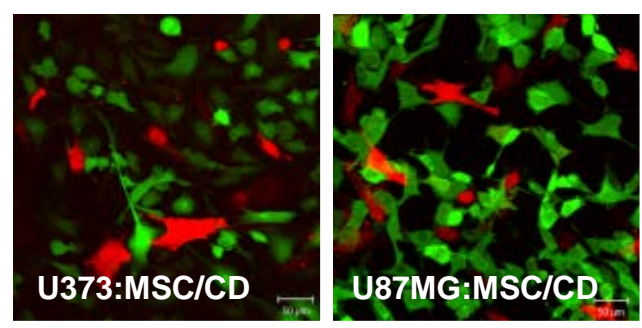

Fig.S2

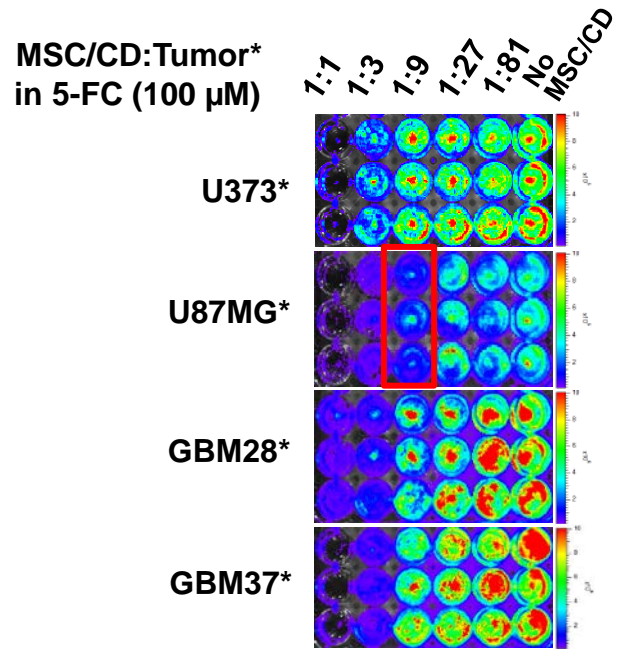

Fig.S3

A

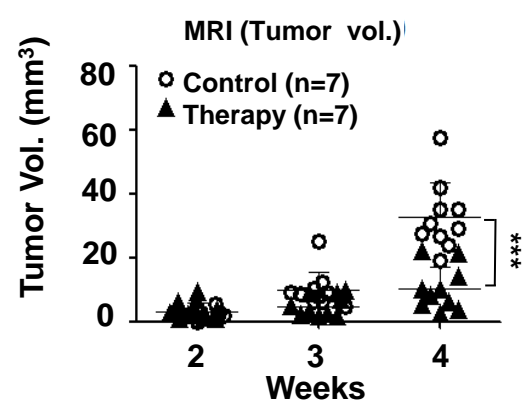

B

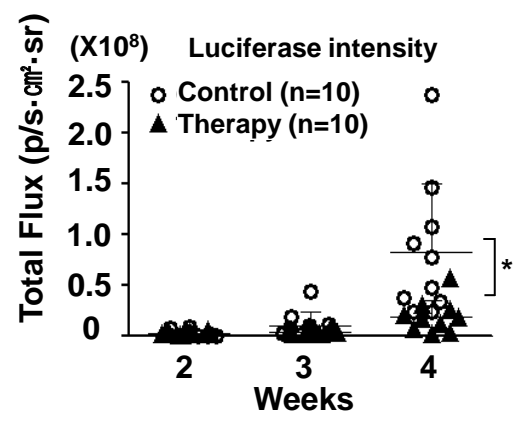

**Fig.S4**

**A.**

weeks

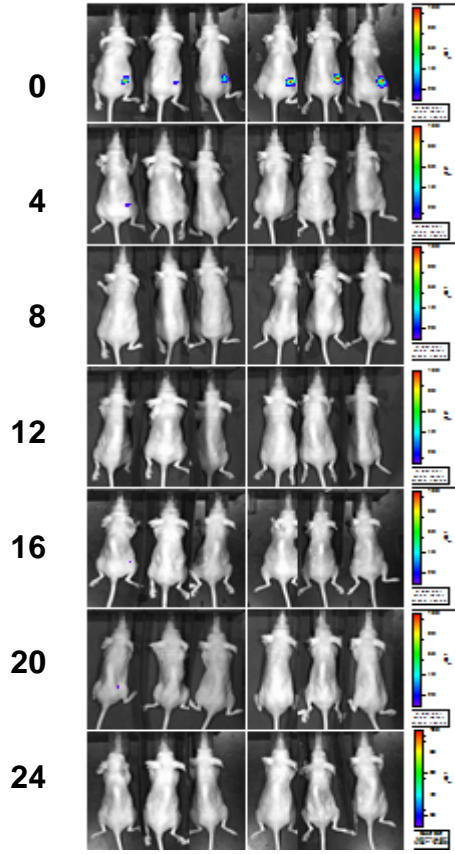

**B.**

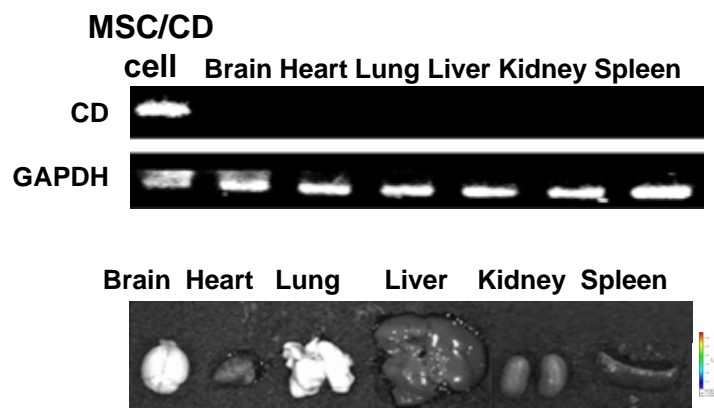

**C.**

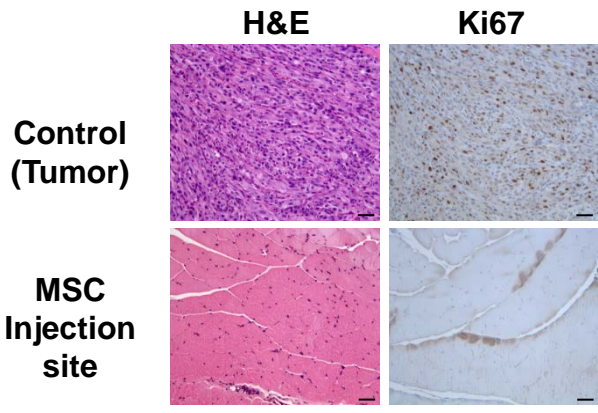

Supplement: thnov06p1477s1.pdf [file thnov06p1477s1.pdf]
